# Supplementary material for: Carbon encapsulation of silicon via lignosulfonate/chitosan electrostatic assembly and glucose-coating for enhanced lithium-ion battery anodes
Source: Research Square preprint supplement (doi:10.21203/rs.3.rs-7208324/v1), 2025-09-08
Supplement: Supplementary file 1 [file 4eee65acdbaacac8dac78497.docx]

**Carbon encapsulation of silicon via lignosulfonate/chitosan electrostatic assembly and glucose-coating for enhanced lithium-ion battery anodes**

Ling Wu1, Yang Liu1, Tingwei Zhang1,2,*, Yongcan Jin1,2,*, Huining Xiao3

1 Jiangsu Co-Innovation Center of Efficient Processing and Utilization of Forest Resources, College of Light Industry and Food Engineering, Nanjing Forestry University, Nanjing 210037, China;

2 International Innovation Center for Forest Chemicals and Materials, Nanjing Forestry University, Nanjing 210037, China;

3 Department of Chemical Engineering, University of New Brunswick, Fredericton, NB, E3B 5A3, Canada.

Corresponding authors: jinyongcan@njfu.edu.cn (Y.C. Jin); ztwei@njfu.edu.cn (T.W. Zhang)


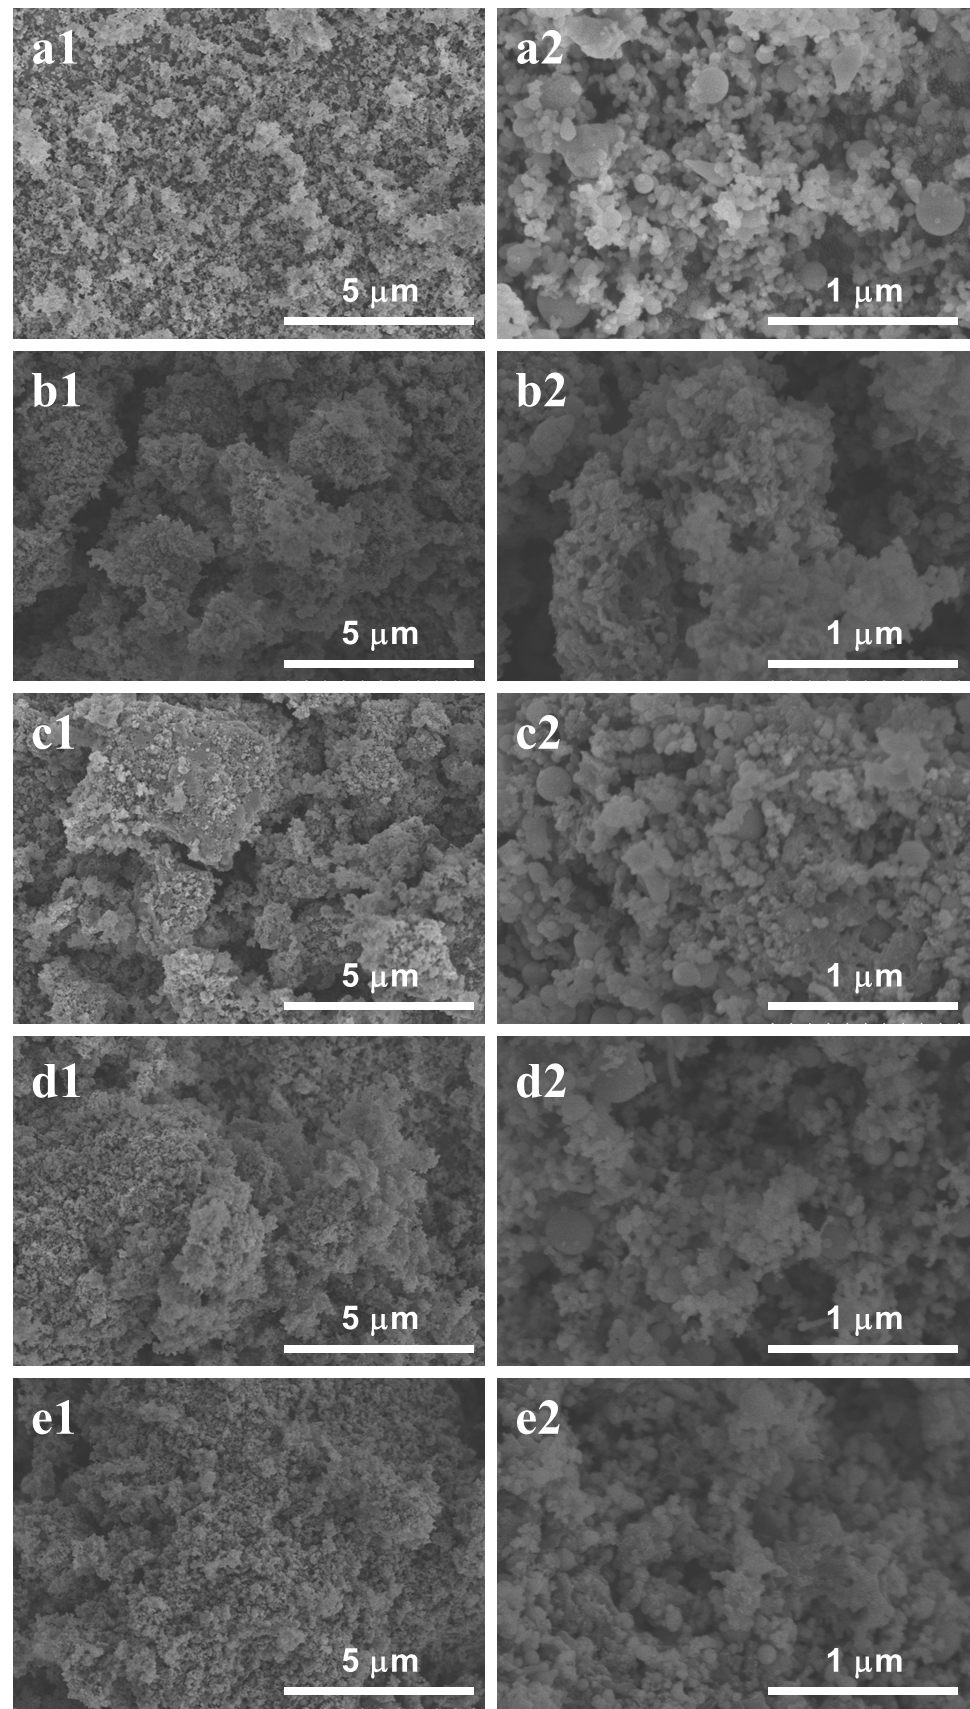


**Fig. S1.** SEM images of Si (a1-a2), 650-4 (b1-b2), 650-4-glu (c1-c2), 650-8 (d1-d2) and 650-8-glu (e1-e2).


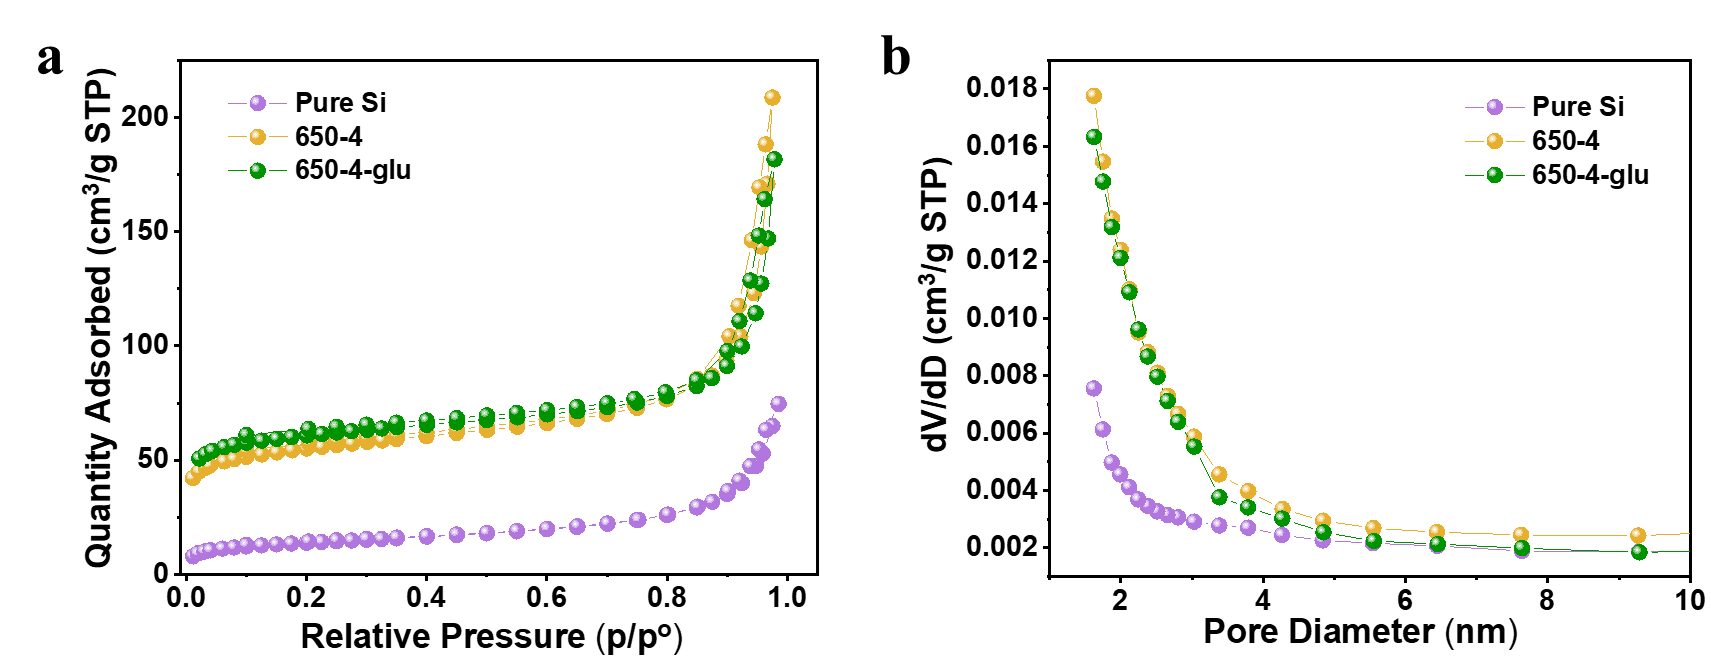


**Fig. S2.** (a) N2 adsorption-desorption isotherms and (b) pore size distribution plots of the samples.

**
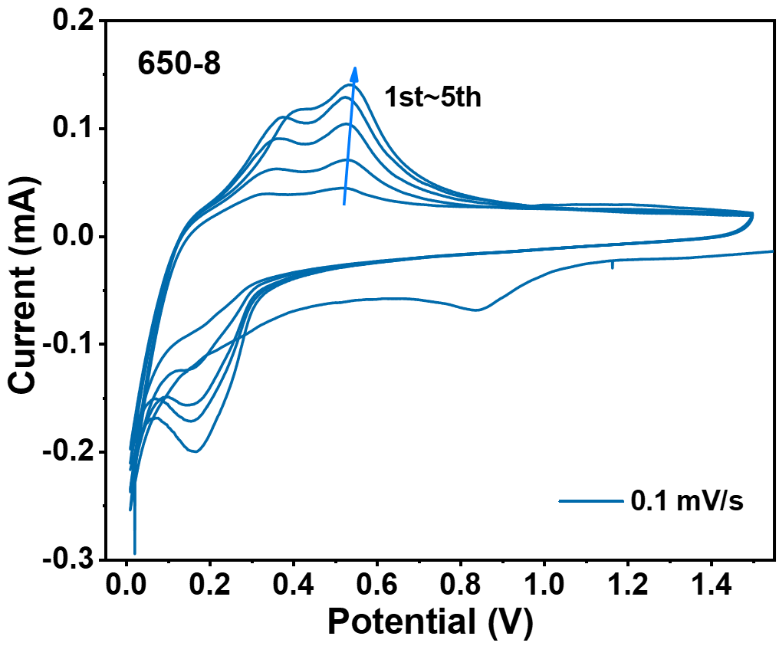
**

**Fig. S3.** CV curves of 650-8.

**Fig. S4.** The charge-discharge curves of different cycles of 650-8.

**
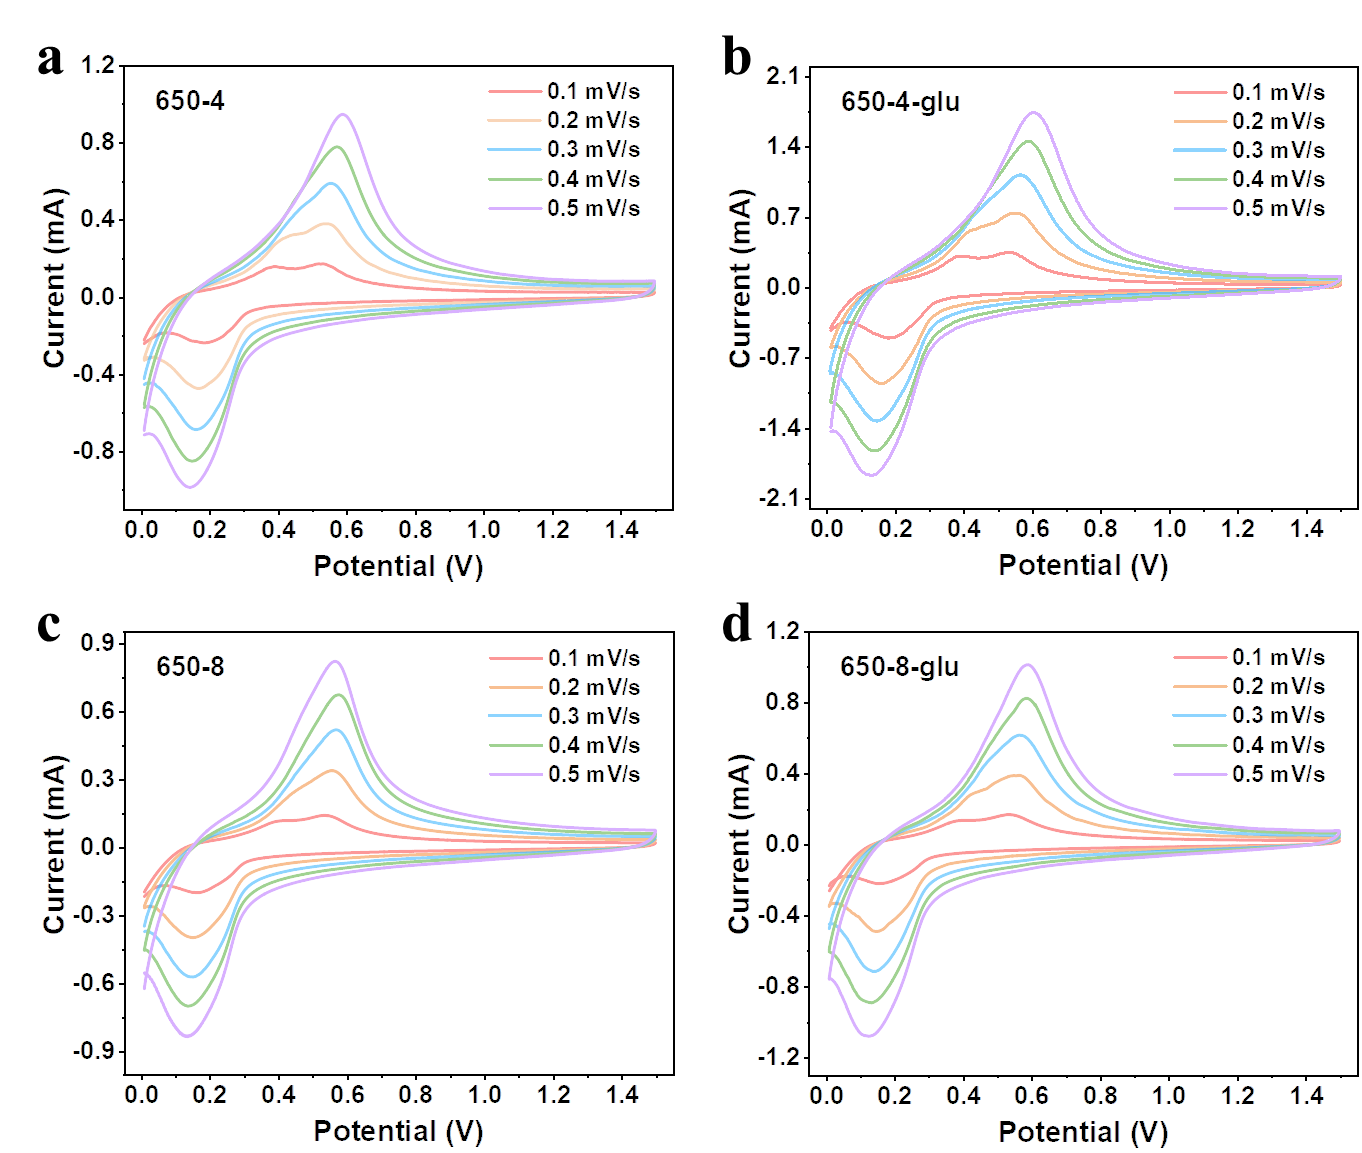
**

**Fig. S5.** CV curves of the samples at different scan rates.


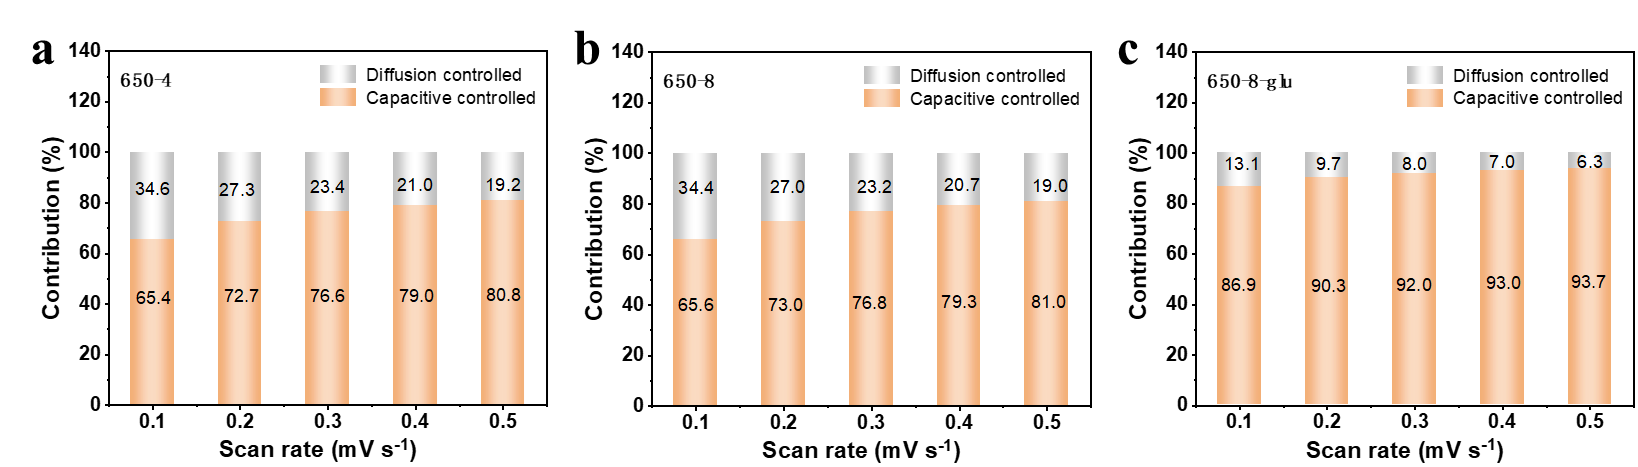


**Fig. S6.** The proportion of diffusion-controlled capacity and capacity-controlled capacity of 650-4 (a), 650-4-glu (b) and 650-8-glu (c) at various scan rates.

**Fig. S7.** EIS plots of the newly prepared electrodes.


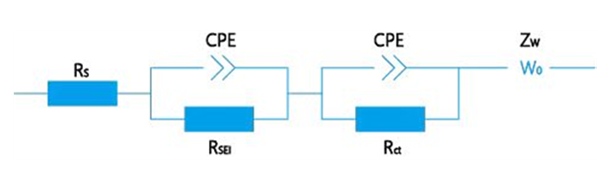


**Fig. S8.** The equivalent circuit of samples.


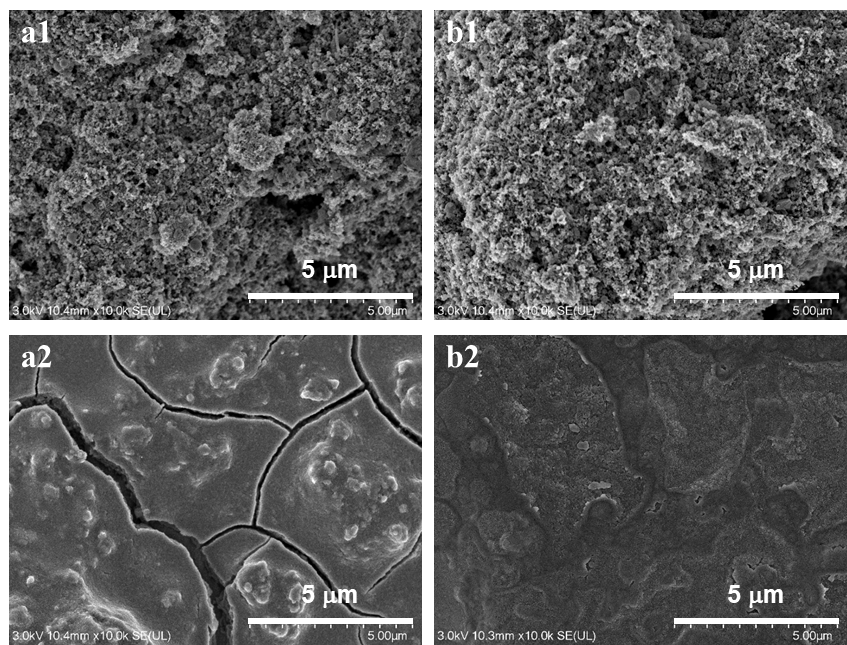


**Fig. S9.** (a1, b1) Top-view SEM images of newly fabricated 650-4 and 650-4-glu electrode materials; (a2, b2) top-view SEM images of post-cycled 650-4 and 650-4-glu electrode materials after 1000 cycles at 1.0 A/g.

**Table S1.** Textural parameters of Si, 650-4 and 650-4-glu determined by N2 adsorption/desorption measurements.

| **Samples** | **Type of isotherm** | **SBET(m2/g)** | **Smicro (m2/g)** | **Total pore volume (cm3/g)** | **t-Plot micropore volume (cm3/g)** | **Rmicro (%)** |
| --- | --- | --- | --- | --- | --- | --- |
| **Si** | II | 50.5 | 20.7 | 0.12 | 0.0086 | 7.2 |
| **650-4** | IV | 207.0 | 153.5 | 0.32 | 0.063 | 19.7 |
| **650-4-glu** | IV | 233.1 | 189.2 | 0.28 | 0.076 | 27.1 |

**Table S2** The Rct values of newly prepared and 200r-cycled electrodes.

| **Samples** | **650-4** | **650-4-glu** | **650-8** | **650-8-glu** |
| --- | --- | --- | --- | --- |
| **New** | 137.9 | 160.0 | 179.5 | 168.3 |
| **200R** | 76.7 | 72.5 | 90.6 | 87.0 |
